# Supplementary material for: Expression of disease‐related miRNAs in white‐matter lesions of progressive multiple sclerosis brains
Source: PubMed Central journal article supplement — Ann Clin Transl Neurol. 2019 Mar 21;6(5):854–62. doi: 10.1002/acn3.750 (PMC6530016; doi:10.1002/acn3.750), 2019-03-21
Supplement: ACN3-6-854-s003.pdf [file ACN3-6-854-s003.pdf]

**Supplementary Table 3- Pathways of genes targeted by significantly changed miRNAs in WMI**

| <b>KEGG pathway</b>                                      | <b>p-value</b> | <b>#genes</b> | <b>#miRNAs</b> |
|----------------------------------------------------------|----------------|---------------|----------------|
| ECM-receptor interaction                                 | 7.13E-14       | 65            | 67             |
| Adherens junction                                        | 2.40E-08       | 67            | 72             |
| Arrhythmogenic right ventricular cardiomyopathy (ARVC)   | 1.41E-07       | 61            | 65             |
| Axon guidance                                            | 1.41E-07       | 104           | 75             |
| Proteoglycans in cancer                                  | 1.41E-07       | 153           | 79             |
| Focal adhesion                                           | 2.40E-06       | 163           | 79             |
| TGF-beta signaling pathway                               | 7.10E-06       | 64            | 70             |
| Morphine addiction                                       | 8.70E-06       | 72            | 70             |
| Hippo signaling pathway                                  | 1.38E-05       | 115           | 77             |
| Endocytosis                                              | 2.01E-05       | 160           | 84             |
| Renal cell carcinoma                                     | 2.05E-05       | 56            | 73             |
| N-Glycan biosynthesis                                    | 2.25E-05       | 39            | 58             |
| ErbB signaling pathway                                   | 2.25E-05       | 72            | 75             |
| Pathways in cancer                                       | 2.25E-05       | 290           | 85             |
| PI3K-Akt signaling pathway                               | 4.39E-05       | 251           | 83             |
| GABAergic synapse                                        | 5.11E-05       | 65            | 74             |
| FoxO signaling pathway                                   | 6.78E-05       | 105           | 73             |
| Wnt signaling pathway                                    | 0.00030403     | 108           | 78             |
| Bacterial invasion of epithelial cells                   | 0.00030518     | 62            | 66             |
| AMPK signaling pathway                                   | 0.00030673     | 97            | 79             |
| Ras signaling pathway                                    | 0.00035157     | 167           | 82             |
| Glycosaminoglycan biosynthesis - keratan sulfate         | 0.00035328     | 12            | 24             |
| Glioma                                                   | 0.00035328     | 51            | 70             |
| Fatty acid biosynthesis                                  | 0.00038717     | 8             | 24             |
| Protein processing in endoplasmic reticulum              | 0.00040918     | 122           | 81             |
| Glutamatergic synapse                                    | 0.00055593     | 86            | 76             |
| Neurotrophin signaling pathway                           | 0.00066818     | 94            | 82             |
| Signaling pathways regulating pluripotency of stem cells | 0.00077017     | 107           | 77             |
| Lysine degradation                                       | 0.00082157     | 35            | 62             |
| Prostate cancer                                          | 0.00119215     | 70            | 75             |
| Mucin type O-Glycan biosynthesis                         | 0.00125524     | 21            | 43             |
| mRNA surveillance pathway                                | 0.00148437     | 70            | 63             |
| Adrenergic signaling in cardiomyocytes                   | 0.002255       | 105           | 74             |
| Choline metabolism in cancer                             | 0.002255       | 79            | 79             |
| Chronic myeloid leukemia                                 | 0.00323472     | 57            | 70             |
| SNARE interactions in vesicular transport                | 0.00383818     | 27            | 53             |
| Rap1 signaling pathway                                   | 0.00405732     | 152           | 78             |
| Pancreatic cancer                                        | 0.00425304     | 52            | 67             |
| Gap junction                                             | 0.00468179     | 65            | 75             |
| Estrogen signaling pathway                               | 0.00468179     | 73            | 75             |
| cAMP signaling pathway                                   | 0.00496431     | 144           | 84             |
| Regulation of actin cytoskeleton                         | 0.00507425     | 154           | 77             |
| Prolactin signaling pathway                              | 0.00551293     | 53            | 72             |
| MAPK signaling pathway                                   | 0.00648632     | 181           | 83             |

|                                                                         |            |     |    |
|-------------------------------------------------------------------------|------------|-----|----|
| Amphetamine addiction                                                   | 0.00827229 | 48  | 64 |
| Synaptic vesicle cycle                                                  | 0.01106736 | 46  | 64 |
| mTOR signaling pathway                                                  | 0.01106736 | 48  | 68 |
| Circadian entrainment                                                   | 0.01106736 | 72  | 73 |
| Thyroid hormone signaling pathway                                       | 0.01106736 | 85  | 75 |
| Melanoma                                                                | 0.01472995 | 55  | 67 |
| Retrograde endocannabinoid signaling                                    | 0.01520997 | 74  | 74 |
| Platelet activation                                                     | 0.0176726  | 93  | 73 |
| Long-term depression                                                    | 0.01821034 | 44  | 67 |
| Fatty acid metabolism                                                   | 0.01983005 | 31  | 49 |
| Oxytocin signaling pathway                                              | 0.01983005 | 113 | 79 |
| Dilated cardiomyopathy                                                  | 0.02005713 | 67  | 61 |
| Nicotine addiction                                                      | 0.02005713 | 29  | 68 |
| Amoebiasis                                                              | 0.02249234 | 74  | 70 |
| Small cell lung cancer                                                  | 0.0229529  | 64  | 65 |
| Cocaine addiction                                                       | 0.02310221 | 36  | 61 |
| Melanogenesis                                                           | 0.02504181 | 73  | 71 |
| Vasopressin-regulated water reabsorption                                | 0.02758365 | 35  | 55 |
| Ubiquitin mediated proteolysis                                          | 0.03444169 | 97  | 79 |
| Endometrial cancer                                                      | 0.03929779 | 39  | 69 |
| Cholinergic synapse                                                     | 0.04535994 | 80  | 76 |
| Circadian rhythm                                                        | 0.04559598 | 26  | 60 |
| p53 signaling pathway                                                   | 0.04559598 | 50  | 62 |
| T cell receptor signaling pathway                                       | 0.04766316 | 76  | 71 |
| Glycosaminoglycan biosynthesis - chondroitin sulfate / dermatan sulfate | 0.04857911 | 15  | 27 |
