# Supplementary material for: Expression of disease‐related miRNAs in white‐matter lesions of progressive multiple sclerosis brains
Source: PubMed Central journal article supplement — Ann Clin Transl Neurol. 2019 Mar 21;6(5):854–62. doi: 10.1002/acn3.750 (PMC6530016; doi:10.1002/acn3.750), 2019-03-21
Supplement: ACN3-6-854-s004.pdf [file ACN3-6-854-s004.pdf]

**Supplementary Table 4- KEGG pathway analysis of genes targeted by pathogenic and protective miRNAs**

| <b>Upregulated Pathogenic miRNAs in WMLs</b>             |                |               |                |
|----------------------------------------------------------|----------------|---------------|----------------|
| <b>KEGG pathway</b>                                      | <b>p-value</b> | <b>#genes</b> | <b>#miRNAs</b> |
| PI3K-Akt signaling pathway                               | 0.038099       | 69            | 7              |
| MAPK signaling pathway                                   | 0.0131893      | 59            | 7              |
| Ras signaling pathway                                    | 0.0025175      | 51            | 7              |
| Rap1 signaling pathway                                   | 0.0025175      | 50            | 7              |
| Regulation of actin cytoskeleton                         | 0.0226995      | 47            | 6              |
| cAMP signaling pathway                                   | 0.0212892      | 46            | 7              |
| Focal adhesion                                           | 0.0306889      | 46            | 7              |
| Endocytosis                                              | 0.0145157      | 45            | 7              |
| Proteoglycans                                            | 0.0049956      | 40            | 7              |
| Viral carcinogenesis                                     | 0.0495451      | 40            | 7              |
| Transcriptional misregulation in cancer                  | 0.0355647      | 39            | 7              |
| FoxO signaling pathway                                   | 0.0009886      | 38            | 7              |
| cGMP-PKG signaling pathway                               | 0.0256075      | 37            | 6              |
| Oxytocin signaling pathway                               | 0.0489916      | 37            | 7              |
| Axon guidance                                            | 0.0023943      | 36            | 7              |
| Ubiquitin mediated proteolysis                           | 0.01593        | 35            | 7              |
| Signaling pathways regulating pluripotency of stem cells | 0.0270347      | 32            | 6              |
| Neurotrophin signaling pathway                           | 0.0134247      | 31            | 7              |
| AMPK signaling pathway                                   | 0.0226995      | 31            | 6              |
| Glutamatergic synapse                                    | 0.0047646      | 29            | 7              |

| <b>Downregulated Pathogenic miRNAs in WMLs</b>           |                |               |                |
|----------------------------------------------------------|----------------|---------------|----------------|
| <b>KEGG pathway</b>                                      | <b>p-value</b> | <b>#genes</b> | <b>#miRNAs</b> |
| Pathways in cancer                                       | 0.0017319      | 66            | 4              |
| Ras signaling pathway                                    | 0.0455952      | 39            | 4              |
| Rap1 signaling pathway                                   | 0.0473378      | 39            | 4              |
| Signaling pathways regulating pluripotency of stem cells | 7.76E-06       | 36            | 4              |
| Proteoglycans in cancer                                  | 0.0016556      | 36            | 4              |
| Adrenergic signaling in cardiomyocytes                   | 0.0149366      | 28            | 4              |
| AMPK signaling pathway                                   | 0.004942       | 27            | 4              |
| Wnt signaling pathway                                    | 0.0264365      | 27            | 4              |

|                                         |           |    |   |
|-----------------------------------------|-----------|----|---|
| FoxO signaling pathway                  | 0.0401161 | 27 | 4 |
| Prostate cancer                         | 0.000174  | 25 | 4 |
| Neurotrophin signaling pathway          | 0.0214238 | 25 | 4 |
| Sphingolipid signaling pathway          | 0.0361575 | 22 | 3 |
| HIF-1 signaling pathway                 | 0.0410532 | 22 | 3 |
| Oocyte meiosis                          | 0.0203943 | 21 | 4 |
| Glioma                                  | 3.878E-07 | 20 | 3 |
| mTOR signaling pathway                  | 0.000174  | 20 | 3 |
| Melanoma                                | 0.0013895 | 20 | 3 |
| ErbB signaling pathway                  | 0.0330705 | 20 | 3 |
| Progesterone-mediated oocyte maturation | 0.0361575 | 20 | 4 |
| Long-term depression                    | 0.0008606 | 18 | 4 |

\*Pathways in shadow boxes are common between pathogenic and protective groups.

| <b>Downregulated Protective miRNAs in WMLs</b>       |                |               |                |
|------------------------------------------------------|----------------|---------------|----------------|
| <b>KEGG pathway</b>                                  | <b>p-value</b> | <b>#genes</b> | <b>#miRNAs</b> |
| MAPK signaling pathway                               | 0.037136       | 64            | 5              |
| Proteoglycans                                        | 0.001217       | 58            | 5              |
| Ras signaling pathway                                | 0.046795       | 57            | 5              |
| Rap1 signaling pathway                               | 0.014478       | 56            | 5              |
| Focal adhesion                                       | 0.018506       | 56            | 5              |
| cAMP signaling pathway                               | 0.040156       | 52            | 5              |
| Transcriptional misregulation in cancer              | 0.046795       | 45            | 6              |
| Insulin signaling pathway                            | 0.026389       | 40            | 5              |
| Wnt signaling pathway                                | 0.005565       | 39            | 6              |
| FoxO signaling pathway                               | 0.024963       | 39            | 5              |
| Signaling pathways regulating pluripotency of stem c | 0.021797       | 38            | 5              |
| Thyroid hormone signaling pathway                    | 0.005565       | 35            | 6              |
| Hippo signaling pathway                              | 0.021797       | 34            | 6              |
| ErbB signaling pathway                               | 9.14E-06       | 33            | 5              |
| Choline metabolism in cancer                         | 0.014857       | 33            | 5              |
| GnRH signaling pathway                               | 0.037136       | 27            | 5              |
| Estrogen signaling pathway                           | 0.010758       | 26            | 5              |
| Long-term potentiation                               | 0.005565       | 25            | 5              |
| Amphetamine addiction                                | 2.74E-05       | 24            | 5              |
| Central carbon metabolism in cancer                  | 0.003743       | 24            | 5              |

| <b>Upregulated Protective miRNAs in WMLs</b> |                |               |                |
|----------------------------------------------|----------------|---------------|----------------|
| <b>KEGG pathway</b>                          | <b>p-value</b> | <b>#genes</b> | <b>#miRNAs</b> |
| Regulation of actin cytoskeleton             | 0.048121       | 44            | 5              |
| cGMP-PKG signaling pathway                   | 0.00616        | 39            | 4              |
| Dopaminergic synapse                         | 0.000853       | 36            | 5              |
| Protein processing in endoplasmic reticulum  | 0.043061       | 33            | 5              |
| Axon guidance                                | 0.00802        | 32            | 5              |
| Adrenergic signaling in cardiomyocytes       | 0.00802        | 31            | 4              |
| FoxO signaling pathway                       | 0.015049       | 30            | 5              |
| Wnt signaling pathway                        | 0.04829        | 29            | 5              |

|                                                  |          |    |   |
|--------------------------------------------------|----------|----|---|
| Choline metabolism in cancer                     | 0.006517 | 27 | 5 |
| ErbB signaling pathway                           | 0.030651 | 23 | 5 |
| Amphetamine addiction                            | 7.98E-05 | 19 | 5 |
| B cell receptor signaling pathway                | 0.031121 | 19 | 5 |
| Gap junction                                     | 0.018338 | 18 | 5 |
| Long-term depression                             | 0.000853 | 17 | 4 |
| Glioma                                           | 0.030651 | 15 | 5 |
| N-Glycan biosynthesis                            | 7.98E-05 | 14 | 5 |
| Mucin type O-Glycan biosynthesis                 | 1.90E-05 | 7  | 4 |
| Glycosaminoglycan biosynthesis - keratan sulfate | 0.000122 | 5  | 3 |

\*Pathways in shadow boxes are common between pathogenic and protective groups.
